# Supplementary material
Source: publisher site journal article supplement (https://www.dovepress.com/article/355181)
Supplement: Supplementary file 1 [file get_supplementary_file.php]

Supplementary Table 1 The decrease of the visual acuity (left)

| Variables                                                                                | Total (n=358)       | Group              |                      | Statistics | P     |
|------------------------------------------------------------------------------------------|---------------------|--------------------|----------------------|------------|-------|
|                                                                                          |                     | Group 1 (n=240)    | Group 2 (n=118)      |            |       |
| The visual acuity (left; 0 month) (diopter), Mean $\pm$ SD                               | 1.16 $\pm$ 0.27     | 0.97 $\pm$ 0.11    | 1.50 $\pm$ 0.00      | t=-69.87   | <.001 |
| The visual acuity (left; 3 month) (diopter), Mean $\pm$ SD                               | 0.93 $\pm$ 0.15     | 0.94 $\pm$ 0.15    | 0.92 $\pm$ 0.17      | t=0.84     | 0.403 |
| The visual acuity (left; 6 month) (diopter), Mean $\pm$ SD                               | 0.90 $\pm$ 0.18     | 0.90 $\pm$ 0.16    | 0.90 $\pm$ 0.21      | t=-0.14    | 0.890 |
| The visual acuity (left; 12 month) (diopter), Mean $\pm$ SD                              | 0.87 $\pm$ 0.19     | 0.86 $\pm$ 0.19    | 0.88 $\pm$ 0.19      | t=-0.97    | 0.335 |
| The decrease of the visual acuity (left) (diopter), M (Q <sub>1</sub> , Q <sub>3</sub> ) | -0.20 (-0.50, 0.00) | 0.00 (-0.20, 0.00) | -0.50 (-0.70, -0.50) | Z=-14.292  | <.001 |

Supplementary Table 2 The decrease of the visual acuity (right)

| Variables                                                                                  | Total (n=358)       | Group              |                      | Statistics | P     |
|--------------------------------------------------------------------------------------------|---------------------|--------------------|----------------------|------------|-------|
|                                                                                            |                     | Group 1 (n=229)    | Group 2 (n=129)      |            |       |
| The visual acuity (right; 0 month) (diopters), Mean $\pm$ SD                               | 1.17 $\pm$ 0.26     | 1.01 $\pm$ 0.15    | 1.49 $\pm$ 0.07      | t=-41.32   | <.001 |
| The visual acuity (right; 3 month) (diopters), Mean $\pm$ SD                               | 0.94 $\pm$ 0.16     | 0.95 $\pm$ 0.15    | 0.92 $\pm$ 0.18      | t=1.45     | 0.147 |
| The visual acuity (right; 6 month) (diopters), Mean $\pm$ SD                               | 0.91 $\pm$ 0.18     | 0.90 $\pm$ 0.18    | 0.92 $\pm$ 0.18      | t=-0.84    | 0.399 |
| The visual acuity (right; 12 month) (diopters), Mean $\pm$ SD                              | 0.88 $\pm$ 0.18     | 0.87 $\pm$ 0.19    | 0.89 $\pm$ 0.18      | t=-1.18    | 0.240 |
| The decrease of the visual acuity (right) (diopters), M (Q <sub>1</sub> , Q <sub>3</sub> ) | -0.20 (-0.50, 0.00) | 0.00 (-0.20, 0.00) | -0.50 (-0.70, -0.50) | Z=-13.252  | <.001 |

Supplementary Table 3 The axial length elongation (left)

| Variables                                                       | Total (n=358)    | Group            |                  |                  | Statistics | P     |
|-----------------------------------------------------------------|------------------|------------------|------------------|------------------|------------|-------|
|                                                                 |                  | Group 1 (n=124)  | Group 2 (n=195)  | Group 3 (n=39)   |            |       |
| The axial length elongation (left; 0 month) (mm), Mean $\pm$ SD | 24.98 $\pm$ 1.01 | 24.09 $\pm$ 0.95 | 25.27 $\pm$ 0.38 | 26.49 $\pm$ 0.37 | F=239.778  | <.001 |
| The axial length elongation (left; 3 month)(mm), Mean $\pm$ SD  | 25.02 $\pm$ 0.97 | 24.15 $\pm$ 0.90 | 25.30 $\pm$ 0.36 | 26.49 $\pm$ 0.39 | F=253.269  | <.001 |
| The axial length elongation (left; 6 month)(mm), Mean $\pm$ SD  | 25.10 $\pm$ 0.80 | 24.29 $\pm$ 0.39 | 25.35 $\pm$ 0.35 | 26.53 $\pm$ 0.34 | F=641.798  | <.001 |

|                                                                              |                   |                   |                   |                   |                       |       |
|------------------------------------------------------------------------------|-------------------|-------------------|-------------------|-------------------|-----------------------|-------|
| The axial length elongation (left; 12 month)(mm), Mean ± SD                  | 25.18 ± 0.80      | 24.38 ± 0.39      | 25.43 ± 0.37      | 26.61 ± 0.36      | F=611.894             | <.001 |
| The axial length elongation (left),(mm) M (Q <sub>1</sub> , Q <sub>3</sub> ) | 0.14 (0.02, 0.30) | 0.18 (0.05, 0.34) | 0.14 (0.02, 0.28) | 0.05 (0.00, 0.27) | χ <sup>2</sup> =6.646 | 0.036 |

Supplementary Table 4 The axial length elongation (right)

| Variables                                                                     | Total (n=358)     | Group             |                   |                   | Statistics            | P     |
|-------------------------------------------------------------------------------|-------------------|-------------------|-------------------|-------------------|-----------------------|-------|
|                                                                               |                   | Group 1 (n=86)    | Group 2 (n=181)   | Group 3 (n=91)    |                       |       |
| The axial length elongation (right; 0 month) (mm), Mean ± SD                  | 25.05 ± 0.84      | 24.01 ± 0.37      | 25.02 ± 0.35      | 26.11 ± 0.47      | F=640.713             | <.001 |
| The axial length elongation (right ; 3 month)(mm), Mean ± SD                  | 25.09 ± 0.82      | 24.07 ± 0.34      | 25.06 ± 0.31      | 26.14 ± 0.46      | F=720.190             | <.001 |
| The axial length elongation (right ; 6 month)(mm), Mean ± SD                  | 25.16 ± 0.82      | 24.14 ± 0.35      | 25.11 ± 0.30      | 26.21 ± 0.44      | F=765.155             | <.001 |
| The axial length elongation (right ; 12 month)(mm), Mean ± SD                 | 25.23 ± 0.81      | 24.24 ± 0.36      | 25.18 ± 0.31      | 26.27 ± 0.44      | F=702.934             | <.001 |
| The axial length elongation (right),(mm) M (Q <sub>1</sub> , Q <sub>3</sub> ) | 0.16 (0.05, 0.32) | 0.20 (0.08, 0.36) | 0.16 (0.05, 0.30) | 0.14 (0.02, 0.32) | χ <sup>2</sup> =4.412 | 0.110 |
